# Supplementary material
Source: PubMed Central journal article supplement (PMC7057307)
Supplement: CJN.11710919SupplementaryData.pdf [file CJN.11710919SupplementaryData.pdf]

*Supplemental material is neither peer-reviewed nor thoroughly edited by CJASN. The authors alone are responsible for the accuracy and presentation of the material.*

**Supplemental Material Table of Contents:**

Supplemental Table 1: Clinical characteristics of diabetic individuals according to quartiles of carbamylated LDL

Supplemental Table 2: Clinical characteristics of diabetic individuals according to quartiles of carbamylated HDL

Supplemental Table 3: Association between plasma carbamylated LDL and primary kidney outcome

Supplemental material is neither peer-reviewed nor thoroughly edited by CJASN. The authors alone are responsible for the accuracy and presentation of the material.

Supplemental Table 1: Clinical characteristics of diabetic individuals according to quartiles of carbamylated LDL

| Quartiles of carbamylated LDL      | Q1             | Q2             | Q3             | Q4             |
|------------------------------------|----------------|----------------|----------------|----------------|
| Age (years)                        | 54 ± 9         | 53 ± 10        | 57 ± 10        | 58 ± 10        |
| M/F (%)                            | 54/46          | 53/47          | 54/46          | 53/47          |
| Duration of diabetes (years)       | 13 ± 7         | 11 ± 7         | 13 ± 8         | 15 ± 8         |
| BMI (kg/m <sup>2</sup> )           | 26 ± 5         | 26 ± 4         | 27 ± 4         | 26 ± 4         |
| Smoker (%)                         | 10             | 11             | 8              | 10             |
| Hypertension (%)                   | 66             | 64             | 75             | 82             |
| Normo/micro/macroalbuminuria (%)   | 56/28/16       | 53/37/10       | 46/34/20       | 45/30/25       |
| Retinopathy (%)                    | 43             | 41             | 48             | 50             |
| Cardiovascular disease (%)         | 14             | 12             | 13             | 16             |
| ACEI/ARB (%)                       | 41             | 50             | 48             | 53             |
| Lipid lowering therapy (%)         | 28             | 31             | 28             | 32             |
| Systolic BP (mmHg)                 | 130 ± 21       | 131 ± 19       | 137 ± 20       | 133 ± 24       |
| Diastolic BP (mmHg)                | 77 ± 9         | 76 ± 10        | 77 ± 9         | 77 ± 9         |
| Fasting glucose (mg/dl)            | 160 ± 50       | 153 ± 49       | 146 ± 45       | 162 ± 58       |
| HbA1c (%)                          | 8.7 ± 1.7      | 8.3 ± 1.6      | 8.3 ± 1.4      | 8.7 ± 1.6      |
| eGFR (ml/min/1.73 m <sup>2</sup> ) | 78 ± 21        | 80 ± 18        | 68 ± 22        | 68 ± 23        |
| Total cholesterol (mg/dl)          | 174 ± 31       | 193 ± 43       | 197 ± 46       | 189 ± 39       |
| Triglyceride (mg/dl)               | 106 (80 - 168) | 115 (80 - 177) | 142 (96 - 186) | 124 (89 - 186) |
| LDL-cholesterol (mg/dl)            | 97 ± 27        | 116 ± 39       | 116 ± 39       | 116 ± 35       |
| HDL-cholesterol (mg/dl)            | 50 ± 12        | 46 ± 12        | 46 ± 15        | 46 ± 12        |

Data are expressed as mean ± SD or median (interquartile range).

Supplemental material is neither peer-reviewed nor thoroughly edited by CJASN. The authors alone are responsible for the accuracy and presentation of the material.

Supplemental Table 2: Clinical characteristics of diabetic individuals according to quartiles of carbamylated HDL

| Quartiles of carbamylated HDL      | Q1             | Q2             | Q3             | Q4             |
|------------------------------------|----------------|----------------|----------------|----------------|
| Age (years)                        | 55 ± 10        | 53 ± 10        | 55 ± 10        | 58 ± 9         |
| M/F (%)                            | 48/52          | 52/48          | 52/48          | 59/41          |
| Duration of diabetes (years)       | 13 ± 7         | 12 ± 8         | 13 ± 8         | 14 ± 8         |
| BMI (kg/m <sup>2</sup> )           | 27 ± 5         | 26 ± 4         | 26 ± 4         | 26 ± 4         |
| Smoker (%)                         | 11             | 10             | 8              | 9              |
| Hypertension (%)                   | 66             | 57             | 70             | 77             |
| Normo/micro/macroalbuminuria (%)   | 58/31/11       | 62/28/10       | 49/36/15       | 32/38/30       |
| Retinopathy (%)                    | 41             | 45             | 43             | 52             |
| Cardiovascular disease (%)         | 13             | 10             | 13             | 19             |
| ACEI/ARB (%)                       | 40             | 49             | 52             | 50             |
| Lipid lowering therapy (%)         | 26             | 27             | 30             | 35             |
| Systolic BP (mmHg)                 | 130 ± 22       | 129 ± 18       | 133 ± 22       | 137 ± 23       |
| Diastolic BP (mmHg)                | 77 ± 9         | 76 ± 10        | 78 ± 9         | 76 ± 10        |
| Fasting glucose (mg/dl)            | 157 ± 49       | 155 ± 49       | 157 ± 45       | 157 ± 59       |
| HbA1c (%)                          | 8.6 ± 1.6      | 8.5 ± 1.6      | 8.5 ± 1.5      | 8.5 ± 1.6      |
| eGFR (ml/min/1.73 m <sup>2</sup> ) | 78 ± 18        | 80 ± 18        | 74 ± 22        | 64 ± 23        |
| Total cholesterol (mg/dl)          | 182 ± 35       | 189 ± 39       | 193 ± 43       | 189 ± 43       |
| Triglyceride (mg/dl)               | 115 (80 - 177) | 124 (80 - 177) | 115 (80 - 177) | 124 (80 - 186) |
| LDL-cholesterol (mg/dl)            | 104 ± 35       | 112 ± 35       | 116 ± 39       | 112 ± 35       |
| HDL-cholesterol (mg/dl)            | 46 ± 12        | 46 ± 15        | 46 ± 13        | 46 ± 12        |

Data are expressed as mean ± SD or median (interquartile range).

Supplemental Table 3: Association between plasma carbamylated LDL and primary kidney outcome (doubling of serum creatinine)

|                                                | Model 1               |                | Model 2               |                |
|------------------------------------------------|-----------------------|----------------|-----------------------|----------------|
|                                                | Hazard ratio (95% CI) | <i>p</i> value | Hazard ratio (95% CI) | <i>p</i> value |
| Carbamylated LDL<br>(µg/ml)                    | 1.05 (0.93, 1.19)     | 0.43           | 1.04 (0.91, 1.19)     | 0.55           |
| Age (years)                                    | 1.35 (1.13, 1.60)     | 0.001          | 1.34 (1.12, 1.60)     | 0.001          |
| Sex (M/F)                                      | 0.65 (0.50, 0.85)     | 0.001          | 0.66 (0.50, 0.87)     | 0.003          |
| BMI (kg/m <sup>2</sup> )                       | 1.29 (1.13, 1.46)     | <0.001         | 1.27 (1.11, 1.45)     | <0.001         |
| Duration of diabetes<br>(years)                | 0.95 (0.84, 1.08)     | 0.46           | 0.96 (0.85, 1.09)     | 0.56           |
| Smoker (N/Y)                                   | 1.11 (0.72, 1.72)     | 0.63           | 1.11 (0.71, 1.72)     | 0.65           |
| Systolic BP (mmHg)                             | 1.15 (1.01, 1.30)     | 0.03           | 1.15 (1.02, 1.31)     | 0.03           |
| HbA <sub>1c</sub> (%)                          | 1.27 (1.12, 1.43)     | <0.001         | 1.27 (1.11, 1.44)     | <0.001         |
| Baseline eGFR<br>(ml/min/1.73 m <sup>2</sup> ) | 0.42 (0.35, 0.51)     | <0.001         | 0.42 (0.35, 0.51)     | <0.001         |
| Normoalbuminuria                               | Reference             | <0.001         | Reference             | <0.001         |
| Microalbuminuria                               | 2.89 (2.03, 4.11)     | <0.001         | 2.91 (2.04, 4.16)     | <0.001         |
| Macroalbuminuria                               | 8.14 (5.53, 11.98)    | <0.001         | 8.36 (5.65, 12.37)    | <0.001         |
| ACEI/ARB(N/Y)                                  | 1.06 (0.82, 1.38)     | 0.66           | 1.07 (0.82, 1.40)     | 0.61           |
| Lipid lowering<br>therapy(N/Y)                 | 1.28 (0.92, 1.61)     | 0.10           | 1.31 (0.92, 1.62)     | 0.08           |
| LDL-cholesterol<br>(mg/dl)                     | -                     |                | 1.08 (0.95, 1.23)     | 0.26           |
| HDL-cholesterol<br>(mg/dl)                     | -                     |                | 0.93 (0.81, 1.07)     | 0.31           |

The given hazard ratio is for 1-SD change in plasma carbamylated LDL and continuous covariates at baseline. Model 1: adjusted for carbamylated LDL, age, sex, BMI, duration of diabetes, smoking, systolic BP, HbA<sub>1c</sub>, baseline eGFR, albuminuria status, ACEI/ARB therapy and lipid lowering therapy. Model 2: further adjusted for LDL-cholesterol and HDL-cholesterol.
